# Supplementary material for: Sex-specific energy management strategies in response to training for increased foraging effort prior to reproduction in captive zebra finches
Source: Oxford University Press journal article supplement (doi:10.1242/jeb.235846), 2021-02-01
Supplement: jeb235846supp.pdf [file jeb235846supp.pdf]

Table S1. Statistical output showing all variables and linear mixed effect models. Response variables are highlighted in bold. Corresponding predictors are underlined.

| <b>Model</b>                                      | <b>Random factor</b> | <b>Estimated variance</b> | <b>Residual variance</b> | <b>numDF</b> | <b>denDF</b> | <b>t-value</b> | <b>F-value</b> | <b>P-value</b> |
|---------------------------------------------------|----------------------|---------------------------|--------------------------|--------------|--------------|----------------|----------------|----------------|
| <b>mass</b> ~ sex * <u>time</u> *trt + pre-mass   | id                   | 0.400                     | 0.467                    | 1            | 29           | .              | 0.418          | 0.523          |
| <b>mass</b> ~ <u>time</u> *trt + pre-mass         | id                   | 0.479                     | 0.430                    | 1            | 29           | .              | 0.877          | 0.357          |
| <b>mass</b> ~ sex * <u>time</u> + pre-mass        | id                   | 0.479                     | 0.430                    | 1            | 29           | .              | 2.259          | 0.144          |
| <b>mass</b> ~ sex * trt + pre-mass                | id                   | 0.479                     | 0.430                    | 1            | 51           | .              | 0.254          | 0.616          |
| <b>mass</b> ~ sex* <u>time</u> *trt + pre-mass    | id                   | 0.479                     | 0.430                    | 1            | 51           | .              | 0.017          | 0.898          |
| <b>mass</b> ~ sex* <u>time</u> *trt + pre-mass    | id                   | 0.479                     | 0.430                    | 1            | 29           | .              | 41.283         | <0.001         |
| <b>mass</b> ~ sex* <u>time</u> *trt + pre-mass    | id                   | 0.479                     | 0.430                    | 1            | 51           | .              | 0.728          | 0.398          |
| <b>MSDEE</b> ~ sex * <u>time</u> *trt + pre-MSDEE | id                   | 0.072                     | 0.272                    | 1            | 11           | .              | 11.163         | 0.007          |
| <b>MSDEE</b> ~ <u>time</u> *trt + pre-MSDEE       | Female id            |                           |                          | 1            | 8            | .              | 9.20           | 0.016          |
| <b>MSDEE</b> ~ <u>time</u> *trt + pre-MSDEE       | Male id              |                           |                          | 1            | 3            | .              | 9.194          | 0.056          |

Table S2. Statistical output showing all variables and repeatability fitted by restricted maximum likelihood.

| <b>Variable</b>   | <b>Treatment group</b> | <b>Random factor</b> | <b>95% Confidence Interval</b> | <b>R</b> | <b>P-value</b> |
|-------------------|------------------------|----------------------|--------------------------------|----------|----------------|
| mass              | CTR and HF             | id                   | 0.288-0.609                    | 0.457    | <0.001         |
| mass              | HF                     | id                   | 0.051-0.543                    | 0.328    | 0.005          |
| mass              | CTR                    | id                   | 0.309-0.749                    | 0.569    | <0.001         |
| mass-specific DEE | CTR and HF             | id                   | 0.069-0.503                    | 0.302    | 0.006          |
| mass-specific DEE | HF                     | id                   | 0-0.451                        | 0.15     | 0.179          |
| mass-specific DEE | CTR                    | id                   | 0.072-0.669                    | 0.421    | 0.013          |
